# Supplementary material for: LRPPRCmutations cause early-onset multisystem mitochondrial disease outside of the French-Canadian population
Source: Oxford University Press journal article supplement (doi:10.1093/brain/awv291), 2015-10-27
Supplement: awv291_Supplementary_Data.zip [file awv291_Supplementary_Data.zip]

Archive with 2 entries (2 files):
- brain-2015-00976-File011.jpg
- brain-2015-00976-File010.pdf
